# Supplementary material for: ESD Ideas: Climate tipping is not instantaneous – the duration of an overshoot matters
Source: Copernicus journal article supplement (doi:10.5194/esd-16-1523-2025), 2025-09-15
Supplement: Supplementary file [file esd-16-1523-2025-supplement-title-page.pdf › esd-16-1523-2025-supplement-title-page.pdf]

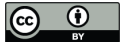

*Supplement of*

## **ESD Ideas: Climate tipping is not instantaneous – the duration of an overshoot matters**

**Paul D. L. Ritchie et al.**

*Correspondence to:* Paul D. L. Ritchie ([paul.ritchie@exeter.ac.uk](mailto:paul.ritchie@exeter.ac.uk))

- [esd-16-1523-2025-supplement-title-page.pdf](#)
- [Overshoots\\_3d\\_movie\\_v2.mp4](#)

The copyright of individual parts of the supplement might differ from the article licence.
